# Supplementary material for: Unique clusters of Archaea in Salar de Huasco, an athalassohaline evaporitic basin of the Chilean Altiplano
Source: Oxford University Press journal article supplement (doi:10.1111/j.1574-6941.2010.00891.x), 2010-04-19

**Supplementary material**

Unique clusters of *Archaea* in Salar de Huasco, an athalassohaline evaporitic basin of the Chilean Altiplano. Dorador et al.

**Figure S1**. Rarefaction curves of archaeal 16S rDNA clone libraries from water (A) and sediment samples (B) show saturation in all samples.


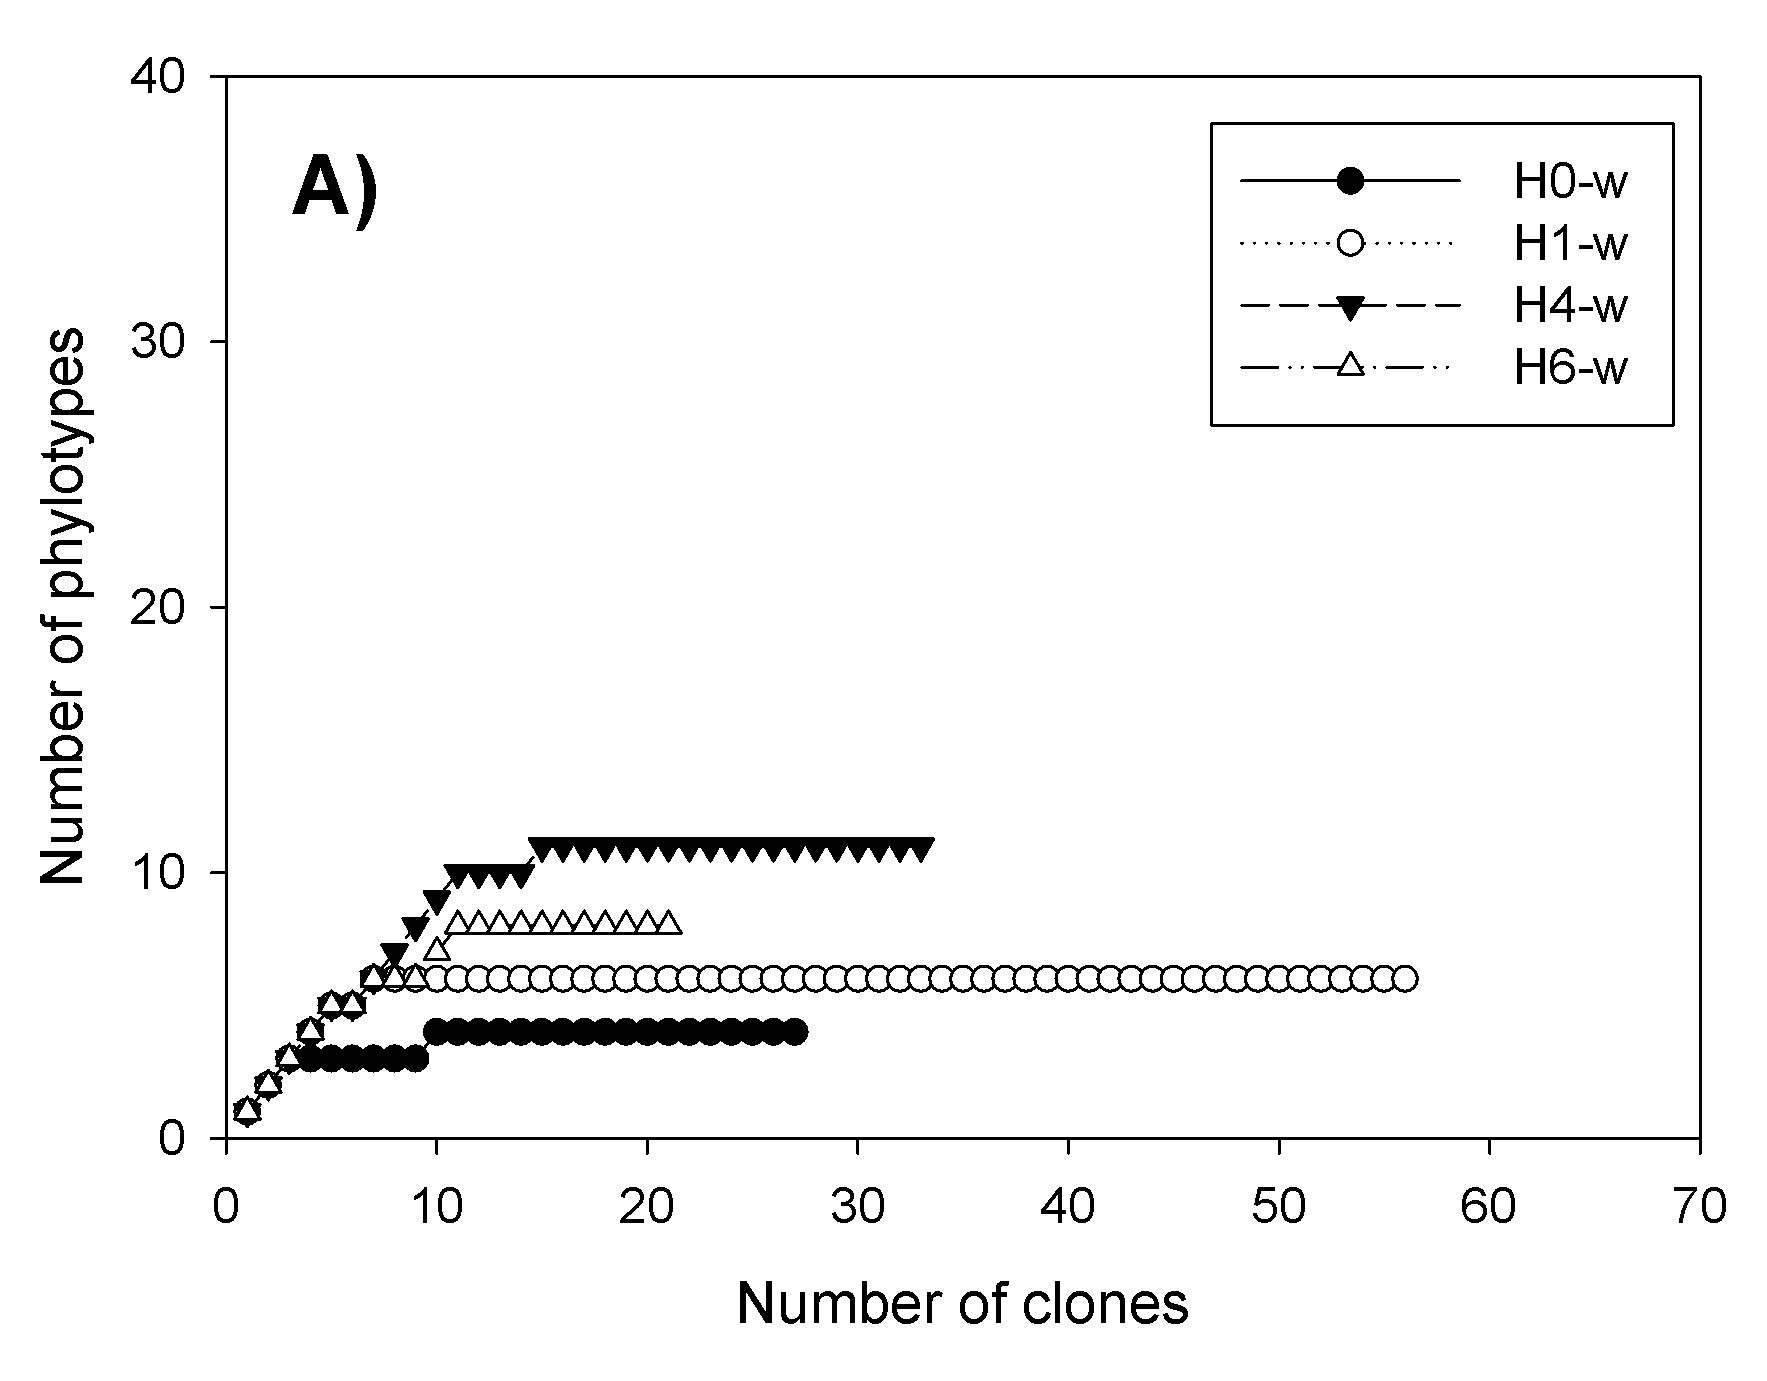


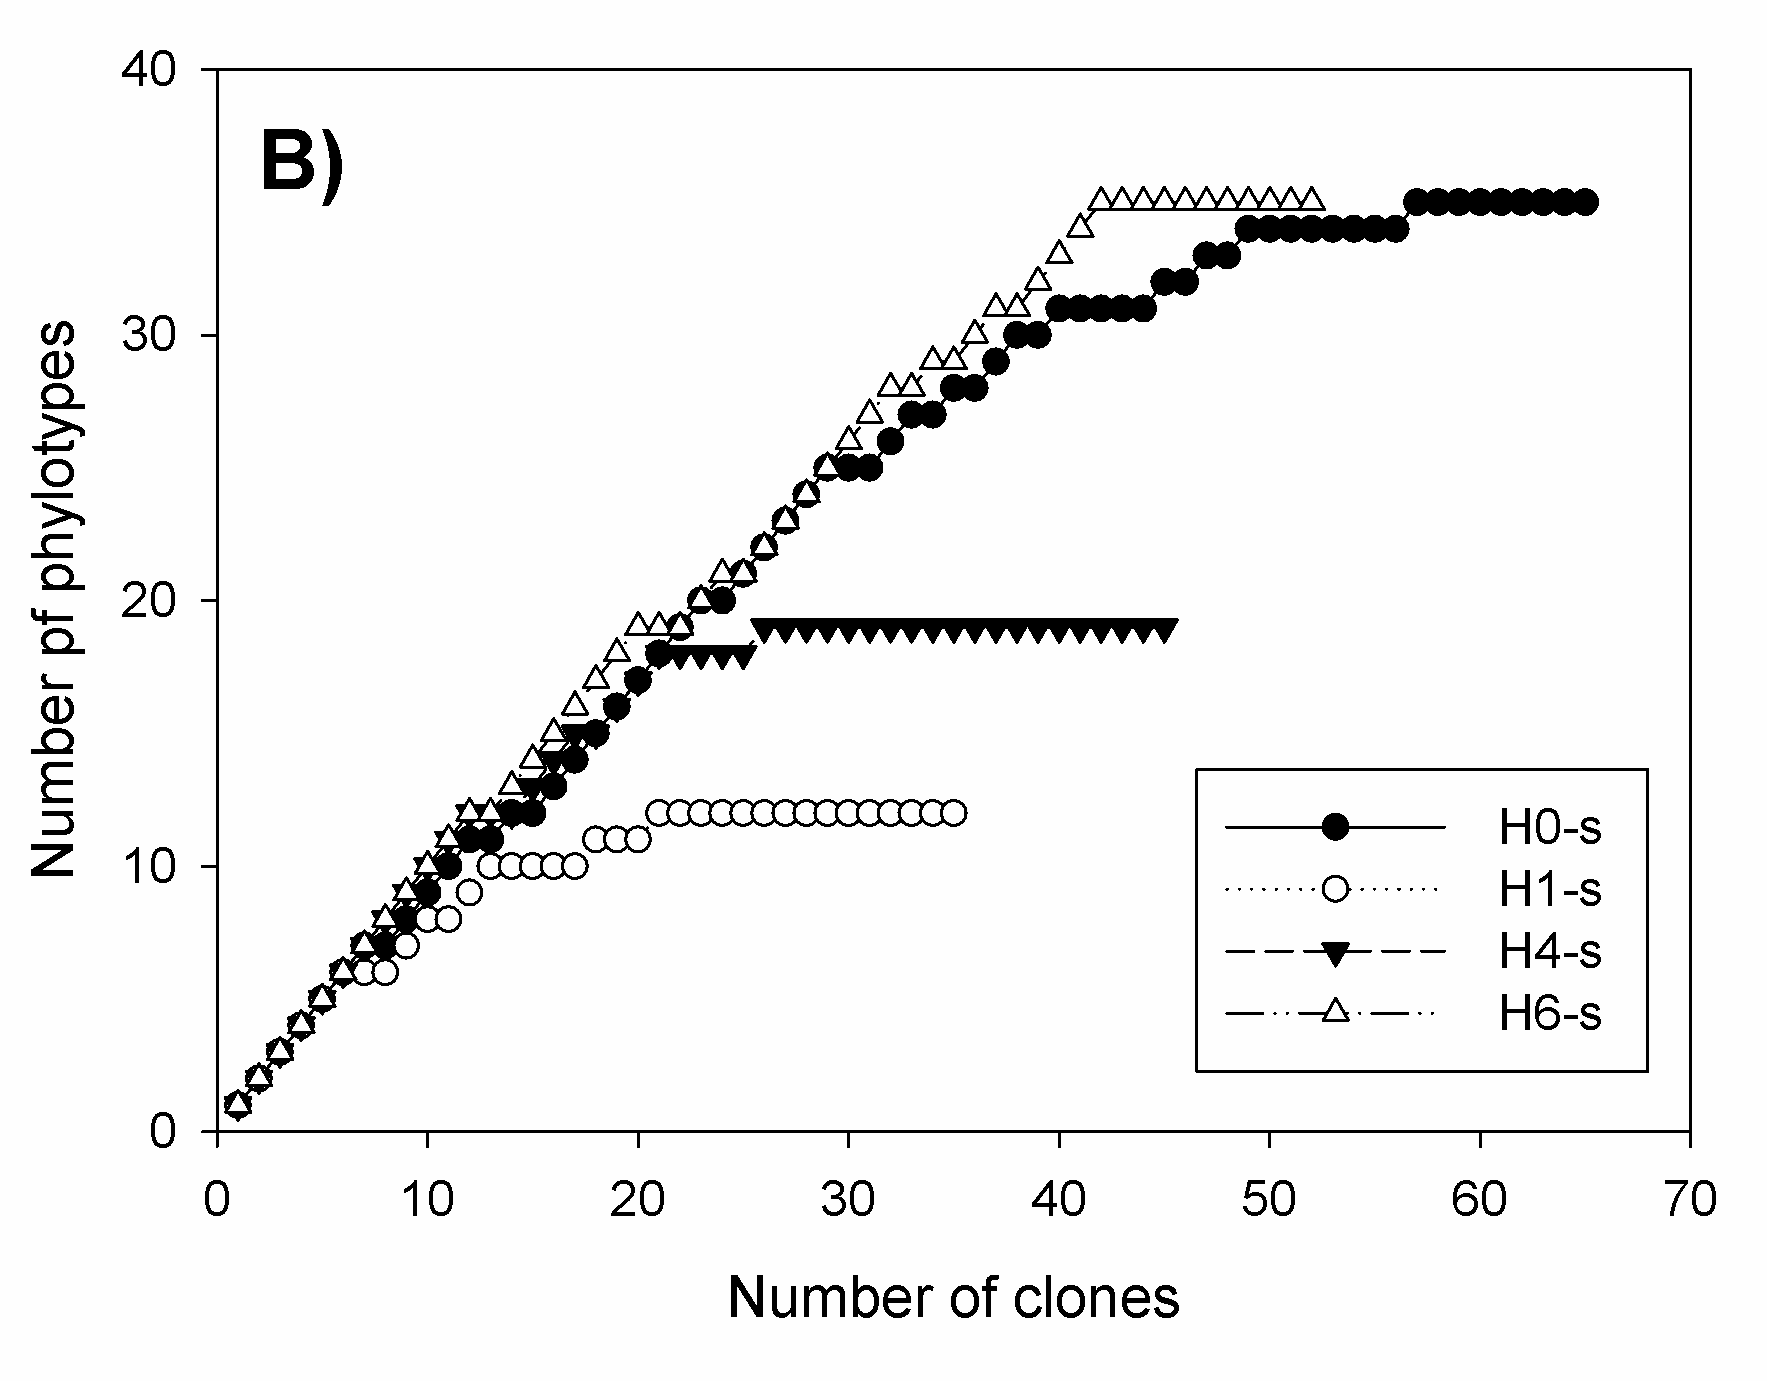


Figure S2. UPGMA clustering of DGGE band patterns of archaeal 16S rDNA from water (w) and sediment (sed) samples of the four sites in Salar de Huasco.


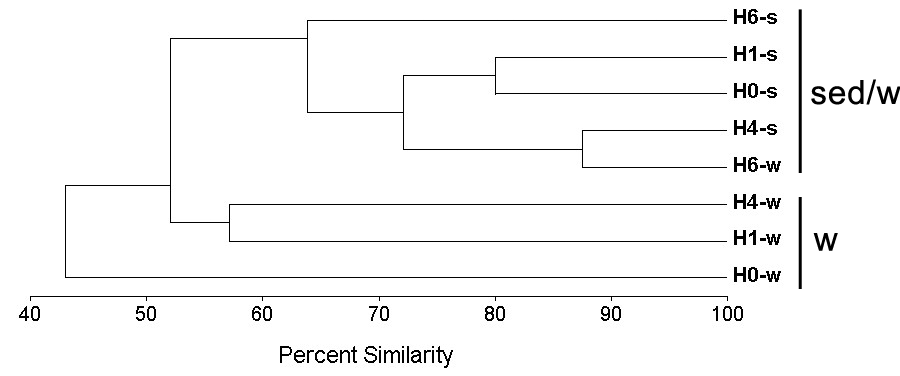


Figure S3. Group average clustering of chemical analysis of water samples in Salar de Huasco taken from Table 1 show marked physicochemical differences between sites.


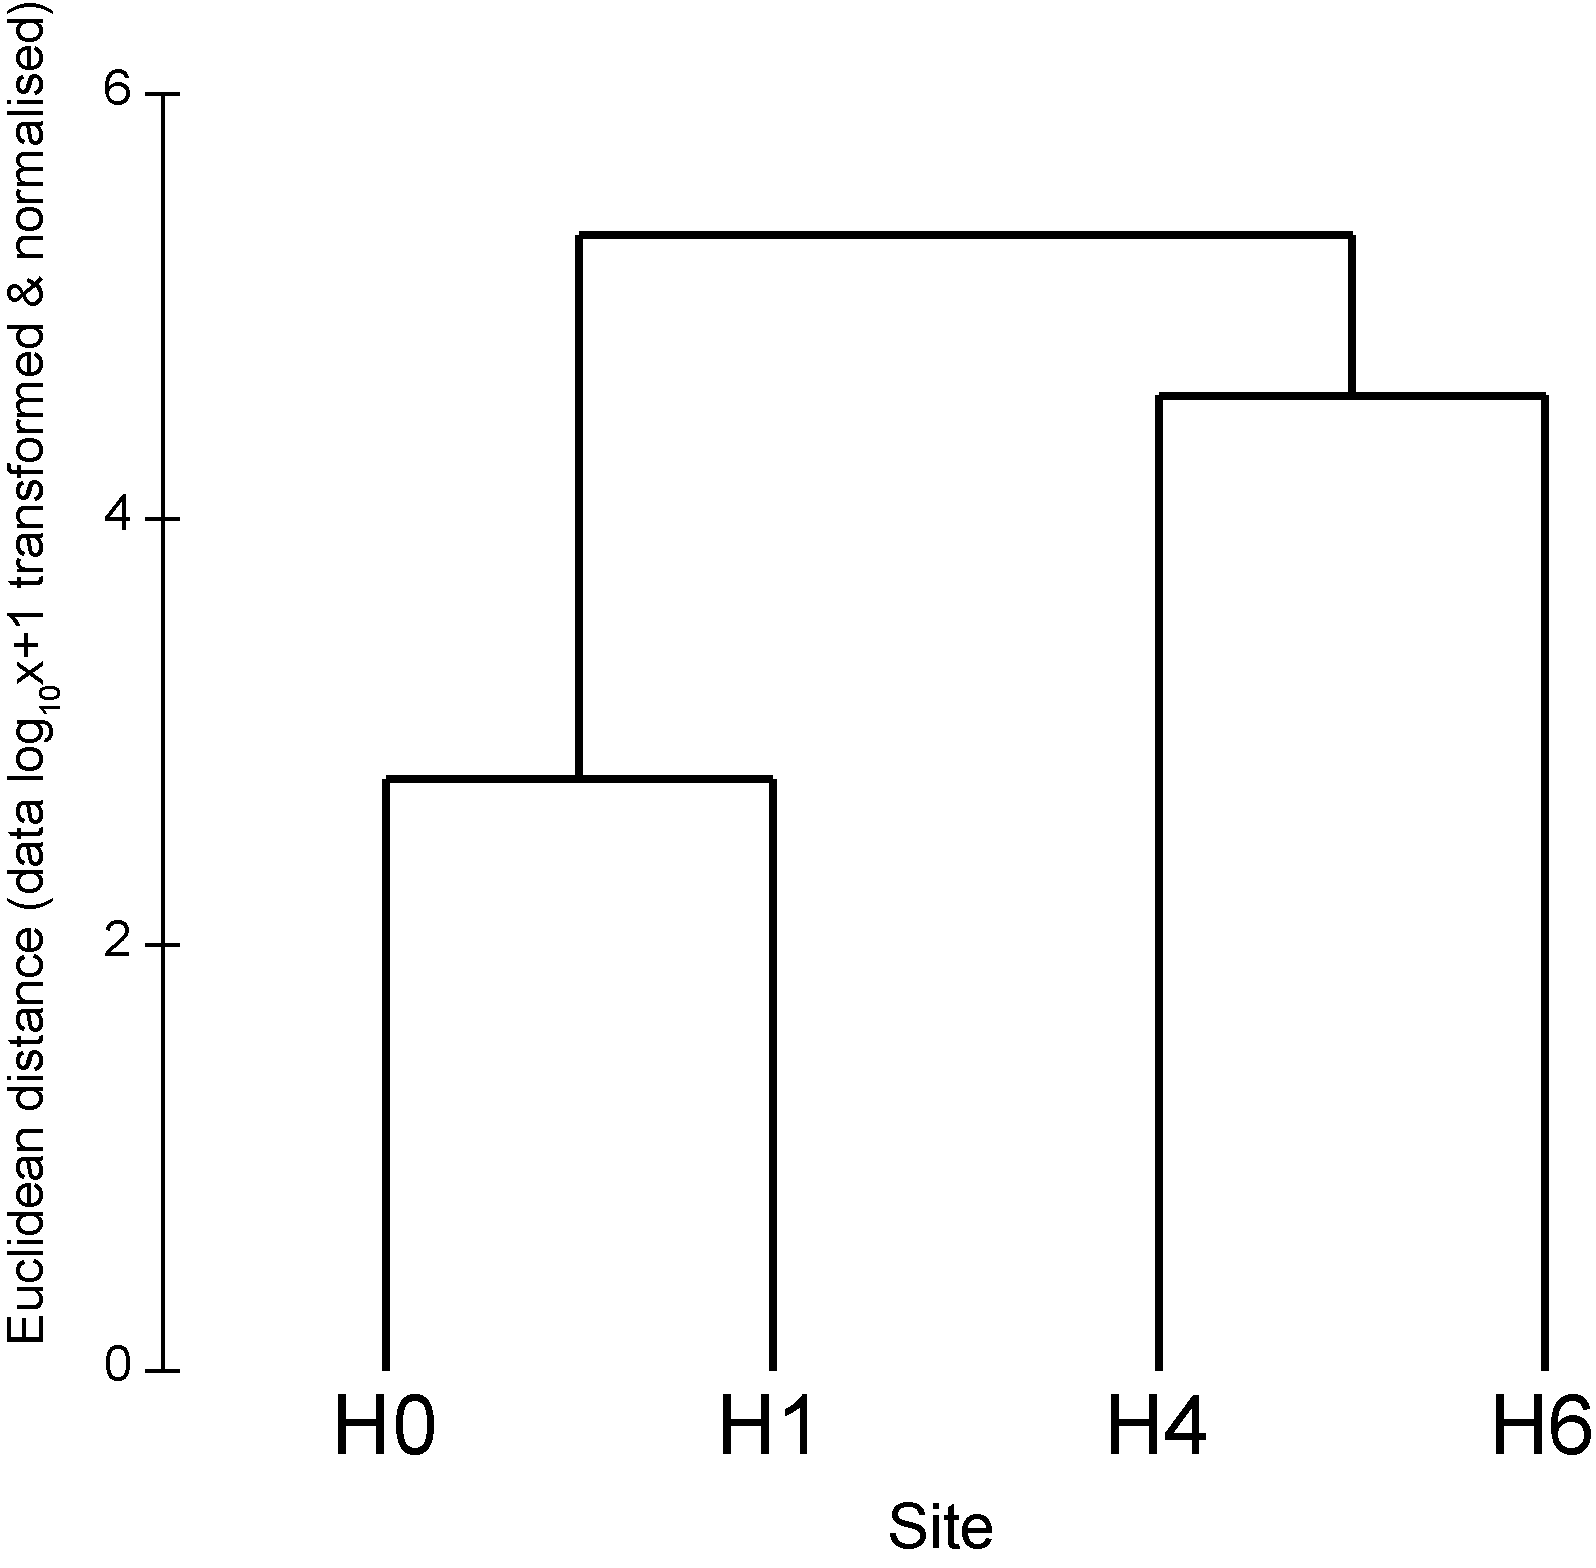


**Figure S4.** Phylogenetic tree based on partial 16S rDNA sequences (800 bp) of phylotypes of *Archaea* in water calculated by maximum likelihood analysis. Group designations: MG-I, Marine Group I (DeLong, 1998); MCG, Miscellaneous Crenarchaeotic Group (Teske, 2006); MHVG, Marine Hydrothermal Vent Group (Takai & Horikoshi, 1999); AAG, Ancient Archaeal Group (Takai & Horikoshi, 1999); MBGB, Marine Benthic Group B (Vetriani *et al*., 1999); Halo, *Halobacteria*; Msar, *Methanosarcinales*; Mmic, *Methanomicrobiales*; MBGD, Marine Benthic Group D; TMEG, Terrestrial Miscellaneous Euryarchaeotal Group (Takai *et al*., 2001); Hua-1, Hua-2, Hua-3, Hua-4, Hua-5, Unidentified Euryarchaeota clusters. The scale bar represents 10% nucleotide sequence difference. Clone sequences from the current study are shown in bold and coded as follows (example of Hua1-w90): Hua1, Salar de Huasco, site H1; w, water sample; 90, clone number. Clones in italics were included in another study (Dorador, 2007) focusing in samples taken during winter in Salar de Huasco.


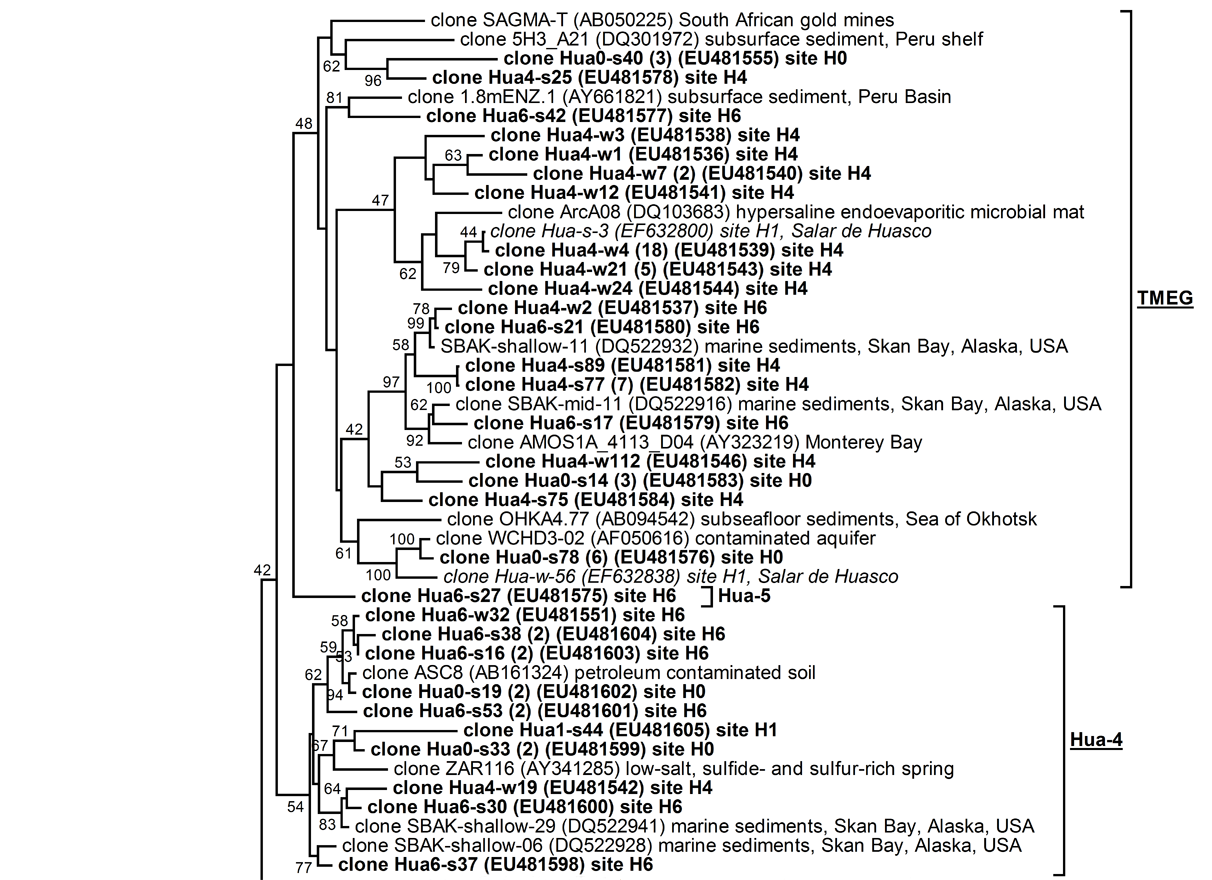


**Figure S4**. Continued


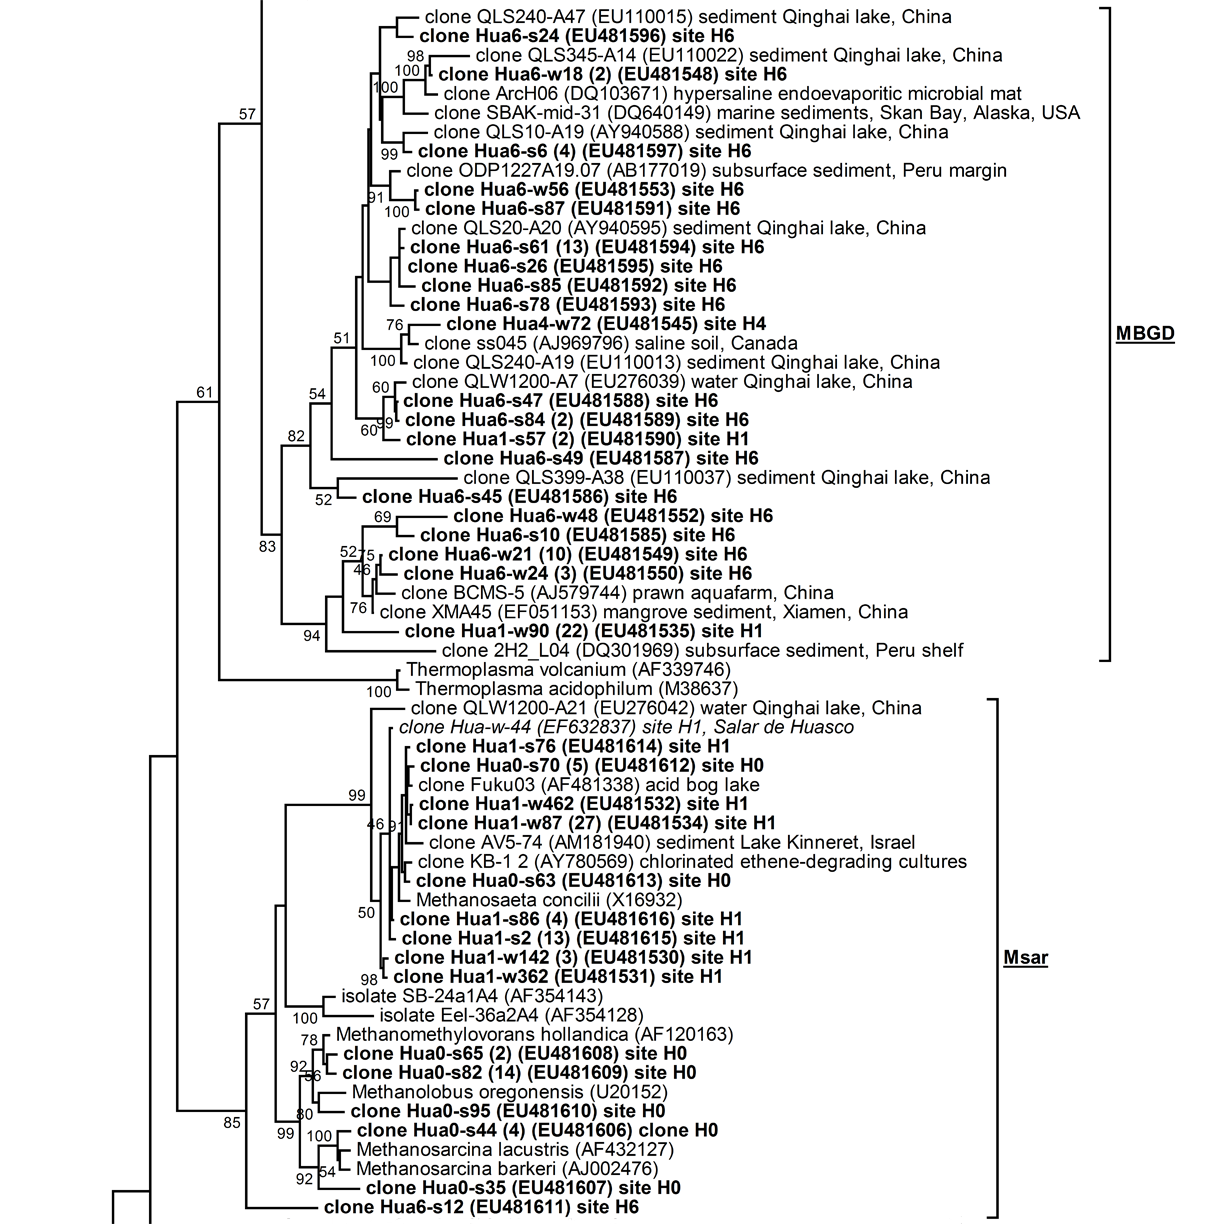


**Figure S4**. Continued


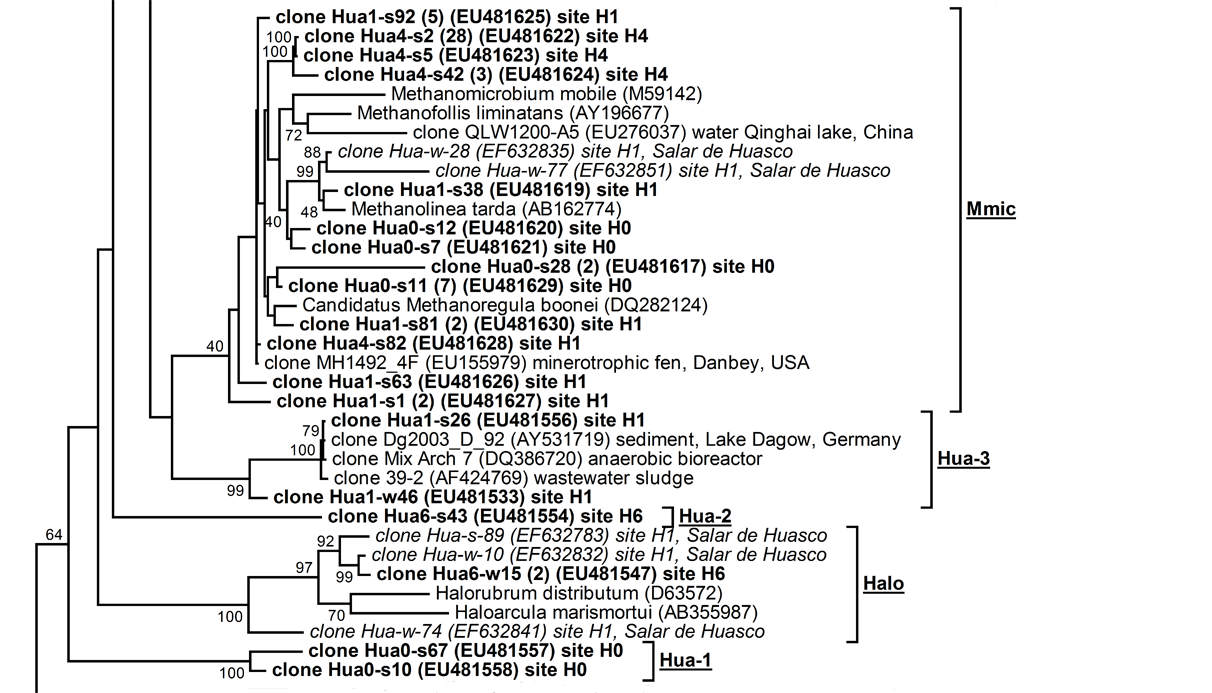


**Figure S4**. Continued


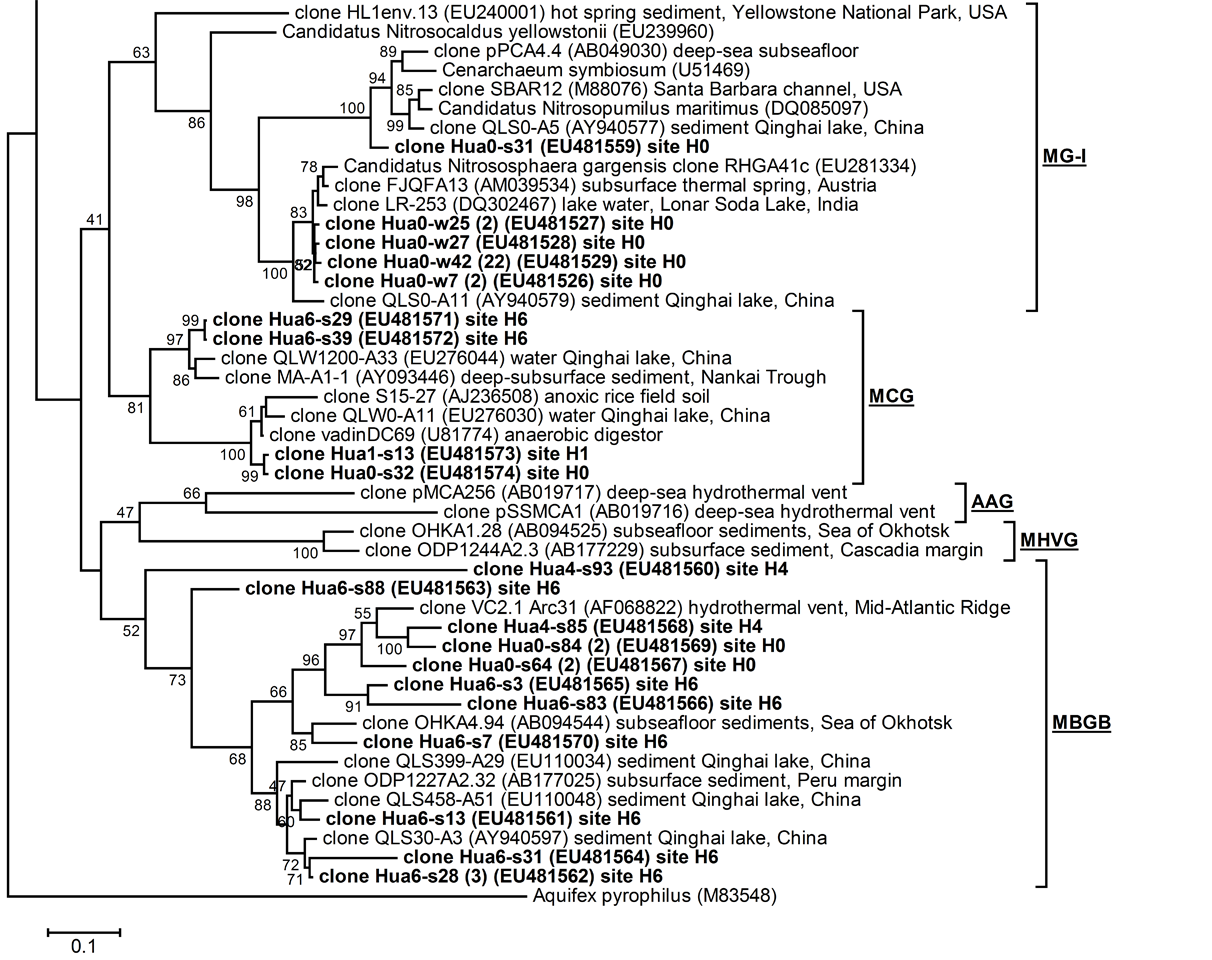

Supplement: FEM_891_sm_supplementary-material.doc [file FEM_891_sm_supplementary-material.doc]
